# Supplementary material for: Taperin (c9orf75), a mutated gene in nonsyndromic deafness, encodes a vertebrate specific, nuclear localized protein phosphatase one alpha (PP1α) docking protein
Source: PubMed Central journal article supplement — Biol Open. 2011 Nov 24;1(2):128–39. doi: 10.1242/bio.2011049 (PMC3507197; doi:10.1242/bio.2011049), 2011-11-24
Supplement: supp_bio.2011049_bio2011049TableS1.pdf [file supp_bio.2011049_bio2011049TableS1.pdf]

**Table S1. Putative taperin interaction partners.** List of the top hits in the nuclear ECFP-taperin quantitative interactome screen, including the specific peptides identified for each and their respective heavy: light amino acid ratios. These ratios indicate the degree of enrichment above the background contamination due to non-specific binding of proteins to the affinity matrix (observed as a peptide ratio of 1:1 due to equal binding in the control and taperin IP). The asterisks (\*) indicate where specific PP1 isoform peptides were identified (the remaining PP1 peptides are common to all 3 mammalian isoforms).

| IPI number    | Gene Name     | Description                                        | H:L Ratio | log H:L ratio | Peptide                     |
|---------------|---------------|----------------------------------------------------|-----------|---------------|-----------------------------|
| IPI00479897.1 | C9orf75; TPRN | Taperin                                            | 285.44    | 8.16          | ATFVSSVRPESSR               |
| IPI00479897.1 | C9orf75; TPRN | Taperin                                            | 92.19     | 6.53          | QSVELPK                     |
| IPI00479897.1 | C9orf75; TPRN | Taperin                                            | 52.38     | 5.71          | HSVAFSK                     |
| IPI00479897.1 | C9orf75; TPRN | Taperin                                            | 18.58     | 4.22          | ASGAPPEGR                   |
| IPI00479897.1 | C9orf75; TPRN | Taperin                                            | 18.15     | 4.18          | WQEQALEQAPR                 |
| IPI00479897.1 | C9orf75; TPRN | Taperin                                            | 16.08     | 4.01          | ALASLR                      |
| IPI00479897.1 | C9orf75; TPRN | Taperin                                            | 14.61     | 3.87          | SPLEVEAQWAVEEGACPR          |
| IPI00479897.1 | C9orf75; TPRN | Taperin                                            | 12.66     | 3.66          | TATALADR                    |
| IPI00479897.1 | C9orf75; TPRN | Taperin                                            | 10.97     | 3.46          | EAEPPEAMLTASQNDLSD-FR       |
| IPI00413611.1 | TOP1          | DNA topoisomerase I                                | 2.82      | 1.50          | VEHINLHPELDGQEYVVEFDF-LGK   |
| IPI00413611.1 | TOP1          | DNA topoisomerase I                                | 2.28      | 1.19          | SGDHLHNDQSIEADFR            |
| IPI00413611.1 | TOP1          | DNA topoisomerase I                                | 2.22      | 1.15          | AVALYFIDK                   |
| IPI00413611.1 | TOP1          | DNA topoisomerase I                                | 1.82      | 0.86          | AEEVATFFAK                  |
| IPI00178667.3 | TOP2A         | DNA topoisomerase II alpha                         | 1.52      | 0.60          | YDVTLDILR                   |
| IPI00178667.3 | TOP2A         | DNA topoisomerase II alpha                         | 1.30      | 0.38          | TLAVSGLGVVGR                |
| IPI00449049.4 | PARP1         | Poly [ADP-ribose] polymerase 1                     | 1.76      | 0.81          | HPDVEVDGFSELR               |
| IPI00449049.4 | PARP1         | Poly [ADP-ribose] polymerase 1                     | 1.47      | 0.56          | TTNFAGILSQGLR               |
| IPI00449049.4 | PARP1         | Poly [ADP-ribose] polymerase 1                     | 1.44      | 0.53          | VFSATLGLVDIVK               |
| IPI00449049.4 | PARP1         | Poly [ADP-ribose] polymerase 1                     | 1.39      | 0.48          | AEPVEVVAPR                  |
| IPI00449049.4 | PARP1         | Poly [ADP-ribose] polymerase 1                     | 1.37      | 0.45          | SLQELFLAHILSPWGAEVK         |
| IPI00449049.4 | PARP1         | Poly [ADP-ribose] polymerase 1                     | 1.37      | 0.45          | TLGDFAAEYAK                 |
| IPI00449049.4 | PARP1         | Poly [ADP-ribose] polymerase 1                     | 1.32      | 0.40          | NTHATTHNAYDLEVIDIFK         |
| IPI00449049.4 | PARP1         | Poly [ADP-ribose] polymerase 1                     | 1.31      | 0.39          | LQLEDDKENR                  |
| IPI00449049.4 | PARP1         | Poly [ADP-ribose] polymerase 1                     | 1.20      | 0.26          | VVSEDFLQDVSASTK             |
| IPI00449049.4 | PARP1         | Poly [ADP-ribose] polymerase 1                     | 1.14      | 0.19          | VGTVIGSNK                   |
| IPI00449049.4 | PARP1         | Poly [ADP-ribose] polymerase 1                     | 1.01      | 0.01          | VGTVIGSNK                   |
| IPI00220834.7 | XRCC5         | Ku80; ATP-dependent DNA helicase II 80 kDa subunit | 1.59      | 0.67          | LTIGSNLSIR                  |
| IPI00220834.7 | XRCC5         | Ku80; ATP-dependent DNA helicase II 80 kDa subunit | 1.44      | 0.53          | VITMFVQR                    |
| IPI00220834.7 | XRCC5         | Ku80; ATP-dependent DNA helicase II 80 kDa subunit | 1.39      | 0.48          | EDIHQGFR                    |
| IPI00220834.7 | XRCC5         | Ku80; ATP-dependent DNA helicase II 80 kDa subunit | 1.37      | 0.45          | DDEAAAVALSSLIHALDDLDM-VAIVR |
| IPI00220834.7 | XRCC5         | Ku80; ATP-dependent DNA helicase II 80 kDa subunit | 1.19      | 0.25          | QLNHFWIIVVQDGITLITK         |
| IPI00220834.7 | XRCC5         | Ku80; ATP-dependent DNA helicase II 80 kDa subunit | 1.15      | 0.20          | TDTLEDLFPTTK                |
| IPI00220834.7 | XRCC5         | Ku80; ATP-dependent DNA helicase II 80 kDa subunit | 1.10      | 0.14          | YAPTEAQLNAVDALIDMSLA-K      |

**Table S1. (Continued)**

| IPI number    | Gene Name | Description                                             | H:L Ratio | log H:L ratio | Peptide             |
|---------------|-----------|---------------------------------------------------------|-----------|---------------|---------------------|
| IPI00220834.7 | XRCC5     | Ku80; ATP-dependent DNA helicase II 80 kDa subunit      | 1.03      | 0.04          | FNNFLK              |
| IPI00465430.4 | XRCC6     | Ku70; ATP-dependent DNA helicase II 70 kDa subunit      | 1.44      | 0.53          | EVAALCR             |
| IPI00465430.4 | XRCC6     | Ku70; ATP-dependent DNA helicase II 70 kDa subunit      | 1.40      | 0.49          | LGSLVDEFK           |
| IPI00465430.4 | XRCC6     | Ku70; ATP-dependent DNA helicase II 70 kDa subunit      | 1.37      | 0.45          | LEDLLR              |
| IPI00465430.4 | XRCC6     | Ku70; ATP-dependent DNA helicase II 70 kDa subunit      | 1.32      | 0.40          | DL LAVV FYGTEK      |
| IPI00465430.4 | XRCC6     | Ku70; ATP-dependent DNA helicase II 70 kDa subunit      | 1.31      | 0.39          | DSLIFLVDASK         |
| IPI00465430.4 | XRCC6     | Ku70; ATP-dependent DNA helicase II 70 kDa subunit      | 1.17      | 0.23          | TFNTSTGGLLLPSDTKR   |
| IPI00465430.4 | XRCC6     | Ku70; ATP-dependent DNA helicase II 70 kDa subunit      | 1.05      | 0.07          | NIYVLQELDNPGAK      |
| IPI00465430.4 | XRCC6     | Ku70; ATP-dependent DNA helicase II 70 kDa subunit      | 1.05      | 0.07          | ILELDQFK            |
| IPI00465430.4 | XRCC6     | Ku70; ATP-dependent DNA helicase II 70 kDa subunit      | 1.01      | 0.01          | FDDPGLMLMGFKPLVLLK  |
| IPI00005705.1 | PPP1CC*   | Protein phosphatase 1C catalytic subunit, gamma isoform | 1.21      | 0.28          | NVQLQENEIR          |
| IPI00550451.1 | PPP1C     | Protein phosphatase 1C catalytic subunit                | 1.16      | 0.21          | IFCCHGGLSPDLQSMEQIR |
| IPI00550451.1 | PPP1CC*   | Protein phosphatase 1C catalytic subunit, gamma isoform | 1.12      | 0.16          | NVQLTENEIR          |
| IPI00550451.1 | PPP1C     | Protein phosphatase 1C catalytic subunit                | 1.05      | 0.07          | AHQVVEDGYEFFAK      |
| IPI00550451.1 | PPP1CA*   | Protein phosphatase 1C catalytic subunit, alpha isoform | 1.02      | 0.03          | LNLD SI GR          |
| IPI00550451.1 | PPP1C     | Protein phosphatase 1C catalytic subunit                | 1.02      | 0.03          | ICGDIHQYYDLLR       |
